# Supplementary material for: Fruit availability for migratory birds: a GIS approach
Source: PeerJ journal article supplement (doi:10.7717/peerj.6394), 2019-02-05
Supplement: allegatipeerj.zip [file allegatipeerj.zip]

**Supplemental Table 2** Tattoni et al. 201X Food availability and flight routes for migratory birds: a GIS approach PeerJ N.XXXXXX

Correspondence of the main forest types used in this paper (Odasso 2002) with the Reference phytosociological associations (to be considered as a guidance), Habitat code of Natura 2000 and Eunis habitat code (na means code non available) according to (Barbati et al 1999, AA.VVV 2010). The last column reports the subtype codes used in this work to assess plants richness and coverage for each cover subtype which differs from the main type depending on to geological substrate and forest stand parameters. These latter codes match with the ones reported in Supplemental Table1.

| Forest Type name in Italian              | (Reference phytosociological associations) Syntaxonomy                                                                                                                                                                                                                                                       | Natura 2000 habitat code | Eunis habitats (level 4/5) and Corine Palearctic equivalent | Subtypes included                           |
|------------------------------------------|--------------------------------------------------------------------------------------------------------------------------------------------------------------------------------------------------------------------------------------------------------------------------------------------------------------|--------------------------|-------------------------------------------------------------|---------------------------------------------|
| Orno - ostrieto tipico                   | Seslerio albicantis-Ostryetum carpinifoliae Lausi et al. 1982 corr. Poldini et Vidali 1995 (= Seslerio variae-Ostryetum carpinifoliae Lausi et al. 1982, Art.43)                                                                                                                                             | na                       | G1.H/P-41.81                                                | OO_mi, OO_ca, OO_si                         |
| Orno - ostrieto primitivo                | Hemerocallido lilioasphodelo-Ostryetum carpinifoliae Poldini 1982 and Cytisantho radiatae-Ostryetum carpinifoliae Wraber 1960 and Seslerio albicantis-Ostryetum carpinifoliae detritica Lausi et al. 1982 corr. Poldini et Vidali 1995 (= Seslerio variae-Ostryetum carpinifoliae Lausi et al. 1982, Art.43) | na                       | G1.H/P-41.81                                                | OO_PRI                                      |
| Castagneto – robinieto                   | p.p. Carici umbrosae-Quercetum petraeae (Poldini 1982) ex Marinek 1994, Quercetosum petraeae subass. (Poldini 1982) ex Marinek 1994; p.p. Buglossoido purpureocaeruleae-Ostryetum carpinifoliae Gerdol, Lausi, Piccoli et Poldini 1982                                                                       | 9260                     | G1.B/P-41.9                                                 | CS_RO                                       |
| Aceri – frassineto                       | Hacquetio epipactido-Fraxinetum excelsioris Marinek 1990 ex Poldini et Nardini 1993 var. geogr. Anemone trifolia Poldini et Nardini 1993 (= Carpino betuli-Fraxinetum excelsioris Poldini 1982 non Duvigneaud                                                                                                | 9180                     | G1.A/P-41.39                                                | AF                                          |
| Aceri – frassineto con ontano            | p.p. Hacquetio epipactido-Fraxinetum excelsioris Marinek 1990 ex Poldini et Nardini 1993 var. geogr. Anemone trifolia Poldini et Nardini 1993 (= Carpino betuli-Fraxinetum excelsioris Poldini 1982 non Duvigneaud 1969 cerastietosum sylvaticae Poldini 1982)                                               | 9180                     | G1.A/P-41.39                                                | AF_OB                                       |
| Aceri – tiglieto                         | Ornithogalo pyrenaici-Carpinetum betuli Marinek, Poldini et Zupani 1983, Tilietosum platyphylli subass. prov. in sched.                                                                                                                                                                                      | 9180                     | G1.A/P-41.39                                                | AT_ca                                       |
| Aceri – tiglieto                         | Ornithogalo pyrenaici-Carpinetum betuli Marincek, Poldini et Zupancic 1983, fraxinetosum excelsioris subass. Poldini in sched. var. Tilia                                                                                                                                                                    | 9180                     | G1.A/P-41.39                                                | AT_mi, AT_si                                |
| Pineta xerica endalpica                  | Erico carneae-Pinetum sylvestris Br.-Bl. in Br.-Bl. et al. 1939 nom. Inv.                                                                                                                                                                                                                                    | na                       | G3.3/P-42.32                                                | PS_XER_ca, PS_XER_ca, PS_XER_mi, PS_XER_si, |
| Pineta pioniera                          | "Erico carneae-Pinetum sylvestris Br.-Bl. in Br.-Bl. et al. 1939 nom. Inv. vArctostaphylos uva-ursi"ar.                                                                                                                                                                                                      | na                       | G4.4                                                        | PS_PRI                                      |
| Pineta tipica con abete rosso            | p.p. Anemono trifoliae-Fagetum sylvaticae with spruce Tregubov 1962 var. geog. Luzula nivea Marincek et al. 1989                                                                                                                                                                                             | na                       | G3.2/P-42.22                                                | PS_AR                                       |
| Pineta con faggio o specie nobili        | p.p. Anemono trifoliae-Fagetum sylvaticae Tregubov 1962 var. geog. Anemone trifolia Marincek et al. 1989                                                                                                                                                                                                     | na                       | G3.6/P-42.61                                                | PS_FA                                       |
| Pineta igrofila                          | Fraxino orni-Pinetum nigrae Martin-Bosse 1967 pinetosum sylvestris subass. Lasen et Poldini 1989                                                                                                                                                                                                             | na                       | G3.6/P-42.61                                                | PS_IGR                                      |
| Pineta con orniello                      | Fraxino orni-Pinetum nigrae Martin-Bosse 1967 pinetosum sylvestris subass. Lasen et Poldini 1989                                                                                                                                                                                                             | na                       | G3.6/P-42.61                                                | PS_OR_ca, PS_OR_mi, PS_OR_si, PS_PN,        |
| Pecceta secondaria o sostitutiva         | Carex alba-Picea phytocoenon                                                                                                                                                                                                                                                                                 | na                       | G3.3/P-42.34                                                | PEX                                         |
| Faggeta con carpino nero                 | p.p. Hacquetio epipactido-Fagetum sylvaticae Kosir 1962, var. geogr. Anemone trifolia Kosir 1979, Luzula nivea subvar. Geogr. Poldini et Nardini 1993                                                                                                                                                        | 9150                     | G1.7/P-41.13                                                | FA_CN                                       |
| Faggeta silicicola a luzula o graminacee | Anemono trifoliae-Fagetum sylvaticae Tregubov 1962 var. geog. Luzula nivea Marincek et al. 1989, caricetosum albae subass. Marincek et al. 1989                                                                                                                                                              | 9110                     | G1.7/P-41.16                                                | FA_GRA                                      |
| Faggeta mesalpica con conifere           | Anemono trifoliae-Fagetum Tregubov 1962 var. geog. Luzula nivea Marincek et al. 1989                                                                                                                                                                                                                         | 9130                     | G1.7/P-41.13                                                | FA_CON                                      |
| Faggeta altimontana                      | Dentario pentaphylli-Fagetum sylvaticae H. Mayer et Hofmann 1969, fagetosum subass.Poldini et Nardini 1993, altitudinal life form.                                                                                                                                                                           | 9140                     | G1.7/P-41.15                                                | FA_ALT                                      |
| Faggeta tipica a dentarie                | "p.p. Dentario pentaphylli-Fagetum sylvaticae H. Mayer et Hofmann 1969"                                                                                                                                                                                                                                      | 9130                     | G1.7/P-41.13                                                | FA_mi, FA_TA, Fa_si                         |

| Forest Type name in Italian           | (Reference phytosociological associations) Syntaxonomy                                                                                                                                              | Natura 2000 habitat code | Eunis habitats (level 4/5) and Corine Palearctic equivalent | Subtypes included                           |
|---------------------------------------|-----------------------------------------------------------------------------------------------------------------------------------------------------------------------------------------------------|--------------------------|-------------------------------------------------------------|---------------------------------------------|
| Abieteto calcicolo con faggio         | Cardamino pentaphylli-Abietetum albae H. Mayer 1974 nom. mut. Em. Gafta 1994                                                                                                                        | 9130                     | G3.1/P-42.13                                                | AB_FA                                       |
| Abieteto dei suoli fertili            | Adenostylo glabrae-Abietetum albae H. Mayer et Hofmann 1969 em. Gafta 1994                                                                                                                          | 9130,9410                | G3.1/P-42.12                                                | AB_ca                                       |
| Abieteto dei suoli fertili            | Cardamino pentaphylli-Abietetum albae H. Mayer 1974 nom. mut. Em. Gafta 1994                                                                                                                        | 9130,9410                | G3.1/P-42.13                                                | AB_mi, AB_si                                |
| Abieteto silicicolo dei suoli acidi   | Luzulo nemorosae-Piceetum abietetis (Schmid et Gaisberg 1936) Br.-Bl. et Siss. in Br.-Bl. et al. 1939 (=Luzulo-Abietetum Oberd. 1957)                                                               | 9130,9410                | G3.1/P-42.13                                                | AB_GRA                                      |
| Mugheta a rododendro ferrugineo       | Rhodothamno-Rhododendretum hirsuti (Aich. 1933) Br.-Bl. et Siss. in Br.-Bl. et al. 1939                                                                                                             | 4060                     | F1.2/P-31.51                                                | MU_FR                                       |
| Mugheta a erica                       | Erico carneae-Pinetum prostratae Zöttl 1951 nom. Inv.                                                                                                                                               | 4070                     | F1.2/P-31.51                                                | MU_ER, MU_SC                                |
| Lecceta con carpino nero              | Fragments of Quercion ilicis Br.-Bl (1931) 1936                                                                                                                                                     | 9340                     | G2.1/P-45.31                                                | LE_CN, LE_TB                                |
| Mugheta a rododendri                  | p.p. Rhododendro ferruginei-Pinetum prostratae Zöttl 1951 nom.inv.                                                                                                                                  | 4070                     | F1.2/P-31.52                                                | MU_ROD                                      |
| Ontaneta di ontano verde              | Alnetum viridis Br.-Bl. 1918                                                                                                                                                                        | na                       | na                                                          | OA                                          |
| Pecceta a erica con pino silvestre    | Erico-Piceetum or Carex alba-Picea phytocoenon                                                                                                                                                      | 9410                     | G3.2/P-42.22                                                | PE_PS_ca, PE_PS_ca, PE_PS_mi, PE_PS_si ,    |
| Pecceta a megaforbie con ontano verde | Adenostylo alliariae-Abietetum albae Kuoch 1954 (= Adenostylo alliariae-Piceetum Hartm. 1942)                                                                                                       | 9410                     | G3.2/P-42.21                                                | PE_OA                                       |
| Pecceta altimontana tipica            | Luzulo nemorosae-Piceetum abietetis suoli mesici altimontana (Schmid et Gaisberg 1936) Br.-Bl. et Siss. in Br.-Bl. et al. 1939 (= p.p. Homogyno-Piceetum, Luzuletosum albidae subass. Zukrigl 1973) | 9410                     | G3.2/P-42.21                                                | PE_mi                                       |
| Pecceta subalpina                     | Luzulo nemorosae-Piceetum abietetis (Schmid et Gaisberg 1936) Br.-Bl. et Siss. in Br.-Bl. et al. 1939 (= p.p. Homogyno-Piceetum, Luzuletosum albidae subass. Zukrigl 1973).                         | 9410                     | G3.2/P-42.21                                                | PE_SUB_mi, PE_XER_si, PE_SUB_mi, PE_SUB_si, |
| Ostrio – querceto                     | Buglossoido purpureoeruleae-Ostryetum carpinifoliae Gerdol, Lausi, Piccoli et Poldini 1982                                                                                                          | na                       | G1.H/P-41.81                                                | OQ                                          |
| Pecceta subalpina                     | Larici-Piceetum abietetis (Br.-Bl. et al. 1954) Ellenberg et Klötzli 1972 (= Homogyno                                                                                                               | 9410                     | G3.2/P-42.21                                                | PE_SUB_ca                                   |
| Pecceta igrofila a sfagni o molinia   | Sphagno girgensohonii-Piceetum abietetis Kuoch 1954                                                                                                                                                 | 9410                     |                                                             | PE_SF                                       |
| Pecceta altimontana tipica            | Adenostylo glabrae-Piceetum abietetis M. Wraber 1966 ex Zukrigl 1973                                                                                                                                | 9410                     | G3.2/P-42.21                                                | PE_ca                                       |
| Lariceto tipico a rododendro          | Asplenio viridis-Laricetum H. Mayer 1984                                                                                                                                                            | 9420                     | G3.3/P-42.34                                                | LA_RF, LA_XER_ca, LA_XER_mi, LA_XER_si, LAX |
| Lariceto con ontano verde             | Calamagrostio villosae-Pinetum cembrae Filipello, Sartori et Vittadini 1981, alnetosum viridis subass. Filipello, Sartori et Vitadini 1981                                                          | 9420                     | G3.3/P-42.32                                                | LA_OA                                       |
| Larici – cembreta tipica a rododendro | Calamagrostio villosae-Pinetum cembrae Filipello, Sartori et Vittadini 1981, Seslerietosum albicans subass., Filipello, Sartori et Vitadini 1981                                                    | 9420                     | G3.3/P-42.32                                                | LC_RF, LC_XER_ca, LC_XER_mi, LC_XER_si,     |
| Lariceto secondario o sostitutivo     | Rhodothamno chamaecisti-Laricetum H. 1984 Mayer                                                                                                                                                     | na                       | G4.4                                                        | LAX                                         |
| Ontaneta di ontano nero               | p.p. Aceri-Fraxinetum s.l.                                                                                                                                                                          | 91E0                     | G1.1/P-44.21                                                | , OB, ON                                    |
| Querceto di rovere (o cerro)          | Carici umbrosae-Quercetum petraeae (Poldini 1982) ex Marincek 1994                                                                                                                                  | 91L0,9170                | G1.8/P-41.26                                                | QR, QC_CA                                   |
| Formazioni transitorie                | Transition shrubland                                                                                                                                                                                | na                       | na                                                          | TR                                          |
