# Supplementary material for: Fruit availability for migratory birds: a GIS approach
Source: PeerJ journal article supplement (doi:10.7717/peerj.6394), 2019-02-05
Supplement: allegatipeerj.zip [file allegatipeerj.zip]

**Supplemental Table 1** Tattoni et al. 201X Food availability and flight routes for migratory birds: a GIS approach PeerJ N.XXXXXX

List of birds captured in the 4 ringing stations considered in the manuscript taken from the official report by Pedrini and Spina (2002). For each species is reported the feeding guild according to (Waldenstroem et al 2002) Guilds: A, raptors; B, ground-foraging invertebrate feeders; C, ground-foraging granivores; D, ground-foraging insectivores; E, arboreal insectivores; F, aerial insectivores; G, reed- and herbaceous plant-foraging insectivores; H, shoreline-foraging invertebrate feeders; I, aquatic invertebrate feeders; J, plant-eating species; K, fish-eating species; L, opportunistic feeders.

A simplified guild also reported, for the purpose of this paper , that takes into account the feeding behavior during the migration , so some insectivores that rely on berries were labeled as omnivores (Jordano 1982, 1985, Müller 1983, Brandle 2002 , Snow and Snow, 1988,, Hernandez, 2009, Muller-Schneider, 1983)

| Species                        | Feeding Guild | Simplified guild | Species                        | Feeding Guild | Simplified guild | Species                              | Feeding Guild | Simplified guild |
|--------------------------------|---------------|------------------|--------------------------------|---------------|------------------|--------------------------------------|---------------|------------------|
| <i>Ixobrychus minutus</i>      | H             | Insectivore      | <i>Prunella modularis</i>      | C             | Granivore        | <i>Parus ater</i>                    | E             | Omnivore         |
| <i>Circus cyaneus</i>          | A             | Raptor           | <i>Erithacus rubecula</i>      | B             | Insectivore      | <i>Parus caeruleus</i>               | E             | Omnivore         |
| <i>Accipiter nisus</i>         | A             | Raptor           | <i>Luscinia megarhynchos</i>   | B             | Insectivore      | <i>Parus cristatus</i>               | E             | Omnivore         |
| <i>Falco tinnunculus</i>       | A             | Raptor           | <i>Luscinia svecica</i>        | B             | Insectivore      | <i>Parus major</i>                   | E             | Omnivore         |
| <i>Falco columbarius</i>       | A             | Raptor           | <i>Phoenicurus ochruros</i>    | D             | Insectivore      | <i>Parus montanus</i>                | E             | Omnivore         |
| <i>Rallus aquaticus</i>        | H             | Insectivore      | <i>Phoenicurus phoenicurus</i> | E             | Insectivore      | <i>Sitta europaea</i>                | L             | Omnivore         |
| <i>Gallinula chloropus</i>     | H             | Insectivore      | <i>Saxicola rubetra</i>        | G             | Insectivore      | <i>Tichodroma muraria</i>            | E             | Insectivore      |
| <i>Gallinago gallinago</i>     | H             | Insectivore      | <i>Oenanthe oenanthe</i>       | D             | Insectivore      | <i>Certhia familiaris</i>            | E             | Insectivore      |
| <i>Scolopax rusticola</i>      | H             | Insectivore      | <i>Turdus torquatus</i>        | B             | Omnivore         | <i>Lanius collurio</i>               | F             | Insectivore      |
| <i>Columba palumbus</i>        | J             | Vegetarian       | <i>Turdus merula</i>           | B             | Omnivore         | <i>Garrulus glandarius</i>           | L             | Omnivore         |
| <i>Otus scops</i>              | A             | Raptor           | <i>Turdus philomelos</i>       | B             | Omnivore         | <i>Nucifraga caryocatactes</i>       | L             | Omnivore         |
| <i>Glaucidium passerinum</i>   | A             | Raptor           | <i>Turdus iliacus</i>          | B             | Omnivore         | <i>Fringilla coelebs</i>             | C             | Granivore        |
| <i>Asio otus</i>               | A             | Raptor           | <i>Turdus viscivorus</i>       | B             | Omnivore         | <i>Fringilla montifringilla</i>      | C             | Granivore        |
| <i>Aegolius funereus</i>       | F             | Insectivore      | <i>Locustella naevia</i>       | G             | Insectivore      | <i>Serinus serinus</i>               | C             | Granivore        |
| <i>Caprimulgus europaeus</i>   | E             | Insectivore      | <i>Acrocephalus scirpaceus</i> | G             | Insectivore      | <i>Serinus citrinella</i>            | C             | Granivore        |
| <i>Jinx torquilla</i>          | E             | Insectivore      | <i>Hippolais icterina</i>      | E             | Omnivore         | <i>Carduelis carduelis</i>           | C             | Granivore        |
| <i>Picus viridis</i>           | E             | Insectivore      | <i>Sylvia melanocephala</i>    | E             | Omnivore         | <i>Carduelis spinus</i>              | C             | Granivore        |
| <i>Dryocopus martius</i>       | E             | Insectivore      | <i>Sylvia curruca</i>          | E             | Omnivore         | <i>Carduelis cannabina</i>           | C             | Granivore        |
| <i>Dendrocopos major</i>       | E             | Insectivore      | <i>Sylvia communis</i>         | G             | Omnivore         | <i>Carduelis flammea</i>             | C             | Granivore        |
| <i>Lullula arborea</i>         | C             | Granivore        | <i>Sylvia borin</i>            | E             | Omnivore         | <i>Loxia curvirostra</i>             | C             | Granivore        |
| <i>Alauda arvensis</i>         | C             | Granivore        | <i>Sylvia atricapilla</i>      | E             | Omnivore         | <i>Pyrrhula pyrrhula</i>             | C             | Granivore        |
| <i>Hirundo rustica</i>         | F             | Insectivore      | <i>Phylloscopus sibilatrix</i> | E             | Omnivore         | <i>Coccothraustes coccothraustes</i> | C             | Granivore        |
| <i>Delichon urbica</i>         | F             | Insectivore      | <i>Phylloscopus collybita</i>  | E             | Omnivore         | <i>Emberiza cirrus</i>               | C             | Granivore        |
| <i>Anthus trivialis</i>        | D             | Insectivore      | <i>Phylloscopus trochilus</i>  | E             | Omnivore         | <i>Emberiza citrinella</i>           | C             | Granivore        |
| <i>Anthus pratensis</i>        | D             | Insectivore      | <i>Regulus regulus</i>         | E             | Insectivore      | <i>Emberiza cia</i>                  | C             | Granivore        |
| <i>Anthus spinoletta</i>       | D             | Insectivore      | <i>Regulus ignicapillus</i>    | E             | Insectivore      | <i>Emberiza hortulana</i>            | C             | Granivore        |
| <i>Motacilla flava</i>         | D             | Insectivore      | <i>Muscicapa striata</i>       | F             | Insectivore      | <i>Emberiza schoeniclus</i>          | C             | Granivore        |
| <i>Motacilla alba</i>          | D             | Insectivore      | <i>Ficedula hypoleuca</i>      | F             | Omnivore         |                                      |               |                  |
| <i>Troglodytes troglodytes</i> | L             | Omnivore         | <i>Aegithalos caudatus</i>     | E             | Omnivore         |                                      |               |                  |
